# Supplementary material for: Low-molecular-weight-heparin can benefit women with recurrent pregnancy loss and sole protein S deficiency: a historical control cohort study from Taiwan
Source: Thromb J. 2016 Oct 28;14:44. doi: 10.1186/s12959-016-0118-9 (PMC5084381; doi:10.1186/s12959-016-0118-9)
Supplement: Additional file 1: Table S1. — Details of the 47 livebirths (resulting in 48 live-birth babies from 46 singletons and 1 twin pregnancy) from 37 patients prescribed low molecular weight heparin low molecular weight heparin. (XLSX 15 kb) [file 12959_2016_118_MOESM1_ESM.xlsx]

## Sheet: raw data-1
Table S1 Details of the 47 livebirths (resulting in 48 live-birth babies from 46 singletons and 1 twin pregnancy) from 37 patients prescribed low molecular weight heparin low molecular weight heparin
Livebirth	Patients no.1	GA (Weeks)	NSD	C/S	Fetal Gender	FBW(g)	Apgar score (1'-->5')	Percentile of FBW (Hadlock)	Birth date (MM/DD/YYYY)
1	1 (1st) 1 (2nd)	38+1		V	F	2930	8-->9	22	05/02/2013
2		37+2		V	F	2965	8-->9	38	02/26/2015
3	2	35	V		F	1568	8-->9	SGA5 (0)	03/12/2015
4	3	38+2		V	F	2975	8-->9	23	03/11/2015
5	4	38+3		V	F	3325	8-->9	50	02/02/2015
6	5	38+1	V		F	3180	8-->9	43	02/24/2015
7	6	36+5	V		M	2640	9-->9	20	12/01/2015
8	7	36		V	M	2606	8-->9	29	10/30/2014
9	8	34		V	M	2004	8-->9	12	09/11/2014
10	9	37+3		V	M	2890	7-->9	29	07/11/2014
11	10 (1st) 10 (2nd)	38+4	V		F	2880	8-->9	14	06/17/2014
12		37	V		F	2705	8-->9	24	08/1/2015
13	11 (1st) 11 (2nd)	35+1		V	F	2280	8-->9	16	03/15/2012
14		35+6		V	F	2560	8-->9	26	06/18/2014
15	12	34+6	V		M	2190	8-->9	13	05/30/2014
16	13 (1st) 13 (2nd)	37+5	V		M	2875	8-->9	24	03/13/2014
17		37+2	V		M	2950	8-->9	36	10/07/2015
18	14 (1st) 14 (2nd)	33+4	V		M	1816	8-->9	SGA (6)	01/25/2014
19		36	V		F	2130	8-->9	SGA (3)	06/19/2015
20	15 (1st) 15 (2nd)	32		V	F	1696	7-->9	16	02/26/2014
21		36+4		V	M	2665	8-->9	24	06/25/2015
22	16	34		V	M	1990	7-->9	11	04/08/2015
23	17	37+5	V		M	3050	9-->9	38	06/14/2015
24	18 (1st) 18 (2nd)	37+3		V	F	3400	8-->9	76	03/01/2013
25		37+5		V	M	3505	8-->9	79	03/30/3015
26	19	34+3		V	F	1538	8-->9	SGA (0)	01/25/2013
27	20	37+2		V	F	2580	8-->9	SGA (10)	06/29/2014
28	21	37+5		V	F	3085	8-->9	42	08/07/2015
29	22	38	V		M	2680	8-->9	SGA (9)	03/26/2013
30	23	37+3	V		F	3330	8-->9	70	09/02/2015
31	24	30+5		V	F	1380	4-->8	SGA (8)	07/04/2015
32	25	35+5		V	M	2402	8-->9	17	07/03/2015
33	26	38+5	V		F	2996	8-->9	19	07/01/2015
34	27 (1st) 27 (2nd)	38		V	F	2740	7-->9	12	07/06/2012
35		34		V	M	1925	8-->9	SGA (7)	03/10/2015
36	28	35+1		V	M	2360	8-->9	23	10/02/2015
37	29 (1st) 29 (2nd)	37+3	V		F	2800	8-->9	22	04/15/2014
38		38+1	V		F	2195	8-->9	SGA (1)	11/12/2015
39	30 (1st) 30 (2nd)	38+4	V		F	2900	8-->9	15	02/19/2014
40		38+2		V	F	3205	8-->9	34	02/13/2016
41	31	31+1		V	F	1550	6—>7	17	05/10/2015
42	32	38+1	V		M	2580	8-->9	SGA (6)	10/07/2015
43 (twin 1)	33 33	36+1		V	M	2420	8-->9	SGA (1)	10/26/2015
43 (twin 2)		36+1		V	M	1680	8-->9	SGA (1)	10/26/2015
44	34	36+5		V	M	3100	8-->9	64	11/18/2016
45	35	37+2		V	F	2305	8-->9	SGA (3)	11/22/2015
46	36	38+5		V	M	3200	8-->9	34	02/12/2016
47	37	37+5	V		F	2870	8-->9	23	03/22/2016
GA, gestational age; NSD, normal spontaneous delivery; C/S, cesarean section; FBW, fetal body weight; SGA, small for gestational age.
1(1st) and (2nd) indicated the first and second time respectively of the patient enrolled in this study.
